# Supplementary material for: Interplay of weak noncovalent interactions in alkoxybenzylidene derivatives of benzohydrazide and acetohydrazide: a combined experimental and theoretical investigation and lipoxygenase inhibition (LOX) studies
Source: Royal Society of Chemistry journal article supplement (doi:10.1039/d0ce01402h), 2020-12-08

**Electronic Supplementary Information (ESI)** for the article “**Interplay of weak noncovalent interactions in alkoxybenzylidene derivatives of benzohydrazide and acetohydrazide: A combined experimental and theoretical investigation and lipoxigenase inhibition (LOX) studies**” by Muhammad Naeem Ahmed<sup>1\*</sup>, Muneeba Arif<sup>1</sup>, Hina Andleeb<sup>2,3</sup>, Syed Wadood Ali Shah<sup>4</sup>, Ifzan Arshad<sup>2</sup>, Muhammad Nawaz Tahir<sup>5</sup>, Mariana Rocha<sup>6</sup>, Diego M. Gil<sup>6,+,\*</sup>

<sup>1</sup>*Department of Chemistry, The University of Azad Jammu & Kashmir, Muzaffarabad 13100, Pakistan.*

<sup>2</sup>*Department of Chemistry, Quaid-i-Azam University, Islamabad 45320, Pakistan.*

<sup>3</sup>*Sulaiman Bin Abdullah Aba Al-Khail – Centre for Interdisciplinary Research in Basic Science (SA-CIRBS), Faculty of Basic and Applied Sciences, International Islamic University, Islamabad, Pakistan*

<sup>4</sup>*Department of Pharmacy, University of Malakand, Chakdara KPK, Pakistan*

<sup>5</sup>*Department of Physics, University of Sargodha, Sargodha Pakistan*

<sup>6</sup>*INBIOFAL (CONICET - UNT), Instituto de Química Orgánica - Cátedra de Química Orgánica I, Facultad de Bioquímica, Química y Farmacia, Universidad Nacional de Tucumán, Ayacucho 471 (T4000INI), San Miguel de Tucumán - Tucumán - Argentina*

**Figure S1.** IR spectra of compounds **1-3** in solid state.

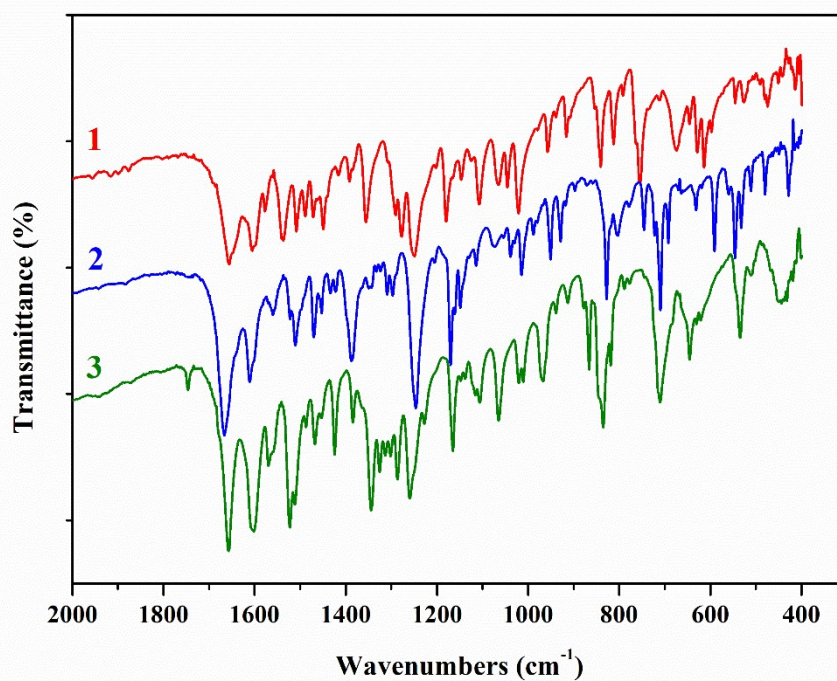

**Figure S2.** Electronic spectra of compounds **1-3** in ethanol as solvent.

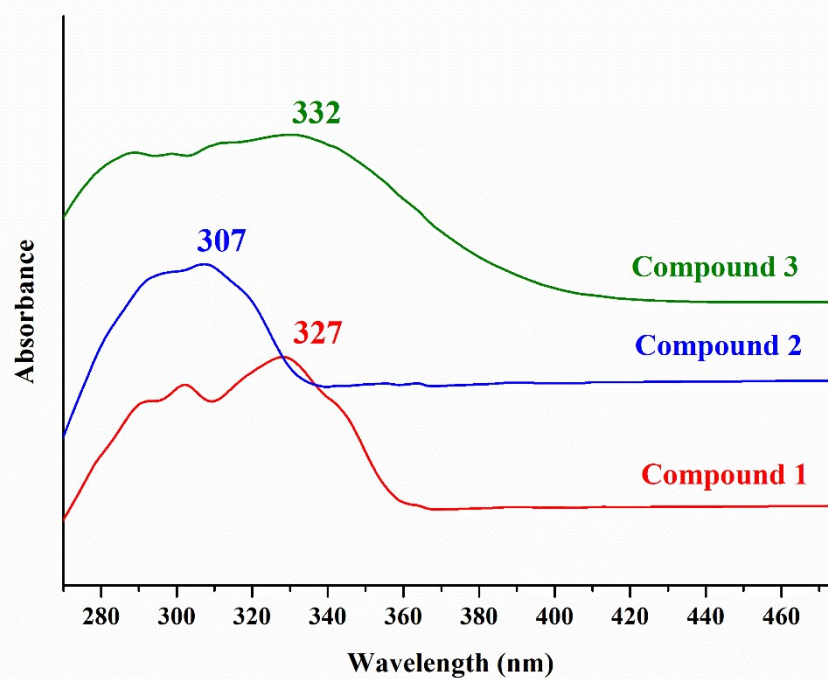

**Figure S3.** Optimized molecular structure of compound **1** calculated at B3LYP/6-311G(d,p) level of theory.

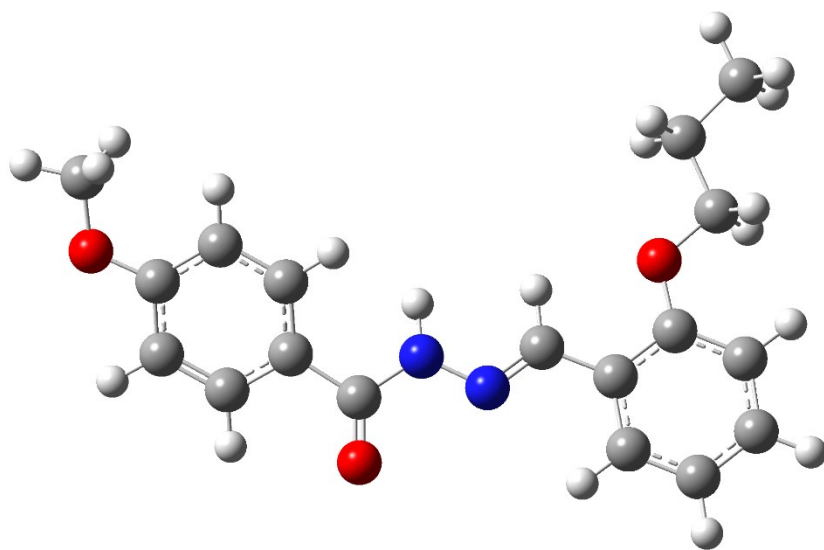

**Figure S4.** Optimized molecular structure of compound **2** calculated at B3LYP/6-311G(d,p) level of theory.

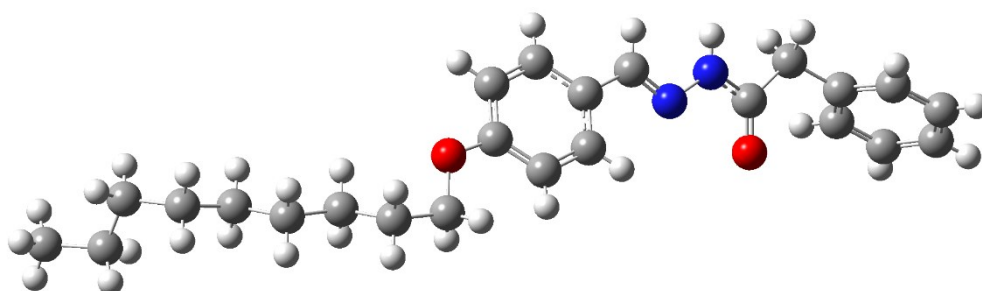

Supplement: d0ce01402h1.pdf [file d0ce01402h1.pdf]
